# Supplementary material for: Root exudates enhanced rhizobacteria complexity and microbial carbon metabolism of toxic plants
Source: PubMed Central journal article supplement — iScience. 2022 Sep 29;25(10):105243. doi: 10.1016/j.isci.2022.105243 (PMC9579507; doi:10.1016/j.isci.2022.105243), 2022-09-29

iScience, Volume 25

## **Supplemental information**

### **Root exudates enhanced rhizobacteria complexity and microbial carbon metabolism of toxic plants**

**Wenyin Wang, Tianhua Jia, Tianyun Qi, Shanshan Li, A. Allan Degen, Jin Han, Yanfu Bai, Tao Zhang, Shuai Qi, Mei Huang, Zihao Li, Jianxin Jiao, and Zhanhuan Shang**

## Supplemental Figures Legends

**Figure S1.** Sampling sites (a), stages of grassland degradation (b) and some sampled plants (c). Related to Figure 1.

**Figure S2.** The relative abundances of phyla in the bacterial community ( $n \geq 3$ ). L, lightly degraded grassland; M, moderately degraded grassland; H, heavily degraded grassland; S, degraded sown grassland. Nr, the bulk soil, namely non-rhizosphere soil. Al, *Ajuga lupulina*; Ef, *Euphorbia fischeriana*; Sg, *Sphallerocarpus gracilis*; Oo, *Oxytropis ochrocephala*; Mk, *Morina kokonorica*; Pk, *Pedicularis kansuensis*; An, *Artemisia nanschanica*; Ad, *Artemisia dubia*; Ap, *Aconitum pendulum*; Lv, *Ligularia virgaurea*; En, *Elymus nutans*; Kp, *Kobresia pygmaea*. Related to Figure 2.

**Figure S3.** The contents of  $\text{NO}_3\text{-N}$  and  $\text{NH}_4\text{-N}$  in bulk soil ( $n = 3$ ,  $P < 0.05$ , One-Way ANOVA) (a). Values are means  $\pm$  S.E.M. of triplicate observations. L, lightly degraded grassland; M, moderately degraded grassland; H, heavily degraded grassland; S, degraded sown grassland. Nr, non-rhizosphere soil. Redundancy analysis (RDA) of the relationship between soil physical and chemical properties and the Bray-Curtis distances in bacterial communities (b). Dots indicate individual rhizospheres of toxic plants. The arrow length and direction correspond to the variance that could be explained by the individual soil physical and chemical properties. Insert: loadings (RDA axis values) for the individual soil physical and chemical properties ( $P < 0.05$ ). Black and gray colors of the bars indicate negative and positive values, respectively. TN, total nitrogen; TP, total phosphorus; TOC, total organic carbon; AP, available phosphorus;  $\text{NO}_3$ , nitrate nitrogen;  $\text{NH}_4$ , ammonium nitrogen; WC, water content. Related to Figure 2.

**Figure S4.** Correlations between main ecological clusters and soil chemical properties. TOC, soil total organic carbon; TN, soil total nitrogen; TP, soil total phosphorus; DON, soil dissolved organic nitrogen; AP, soil total phosphorous; AK, soil available potassium; Na, soil sodium. Related to Figure 3.

**Figure S5.** Clustering results displayed as heatmap (distance measure using Euclidean distance, clustering algorithm using ward.D). L, lightly degraded grassland; M, moderately degraded grassland; H, heavily degraded grassland; S, degraded sown grassland. Mk, *Morina kokonorica*; Pk, *Pedicularis kansuensis*; Lv, *Ligularia virgaurea*; En, *Elymus nutans*; Kp,

*Kobresia pygmaea*. H, M, L in S-Lv represented high, middle and low density of *Ligularia virgaurea* in degraded sown grassland. Related to Figure 4.

**Figure S6.** Correlation heatmap between microbial module eigengene and root exudates in non-toxic plants. Asterisks indicate Spearman's correlations between rhizosphere bacterial modules and root exudates (\*,  $P < 0.05$ ; \*\*,  $P < 0.01$ ). Related to Figure 4.

**Figure S7.** Relationship between microbial module eigengene and soil multi-functionality. Gray indicates confidence intervals. Related to Figure 4.

**Figure S8.** Correlations between phyla of microbial taxa in ME12 and up-regulated compounds in non-toxic plants (a) and toxic plants (b). \*,  $P < 0.05$ ; \*\*,  $P < 0.01$  (Spearman's correlation) . Related to Figure 4.

**Figure S9.** AWCD growth curves of soil microbes in different levels of grassland degradation (n = 3) (a), and principal component analysis (PCA) of carbon source utilization of soil microbial communities (b). In panel a, Values are means  $\pm$  S.E.M. of triplicate observations. L, lightly degraded grassland; M, moderately degraded grassland; H, heavily degraded grassland; S, degraded sown grassland. Nr, bulk soil, that is, non-rhizosphere soil. Al, *Ajuga lupulina*; Ef, *Euphorbia fischeriana*; Sg, *Sphallerocarpus gracilis*; Oo, *Oxytropis ochrocephala*; Mk, *Morina kokonorica*; Pk, *Pedicularis kansuensis*; An, *Artemisia nanschanica*; Ad, *Artemisia dubia*; Ap, *Aconitum pendulum*; Lv, *Ligularia virgaurea*. Related to Figure 5.

**Figure S10.** The networks of bacterial OTUs (a) and root exudation (b) in the rhizosphere of toxic plants. Threshold = 0.2,  $P < 0.05$ ; n, number of OTUs in different color modules. Correlations between OTUs (c) or exudates (d) and plant species in each module. L, lightly degraded grassland; M, moderately degraded grassland; H, heavily degraded grassland; S, degraded sown grassland. Pk, *Pedicularis kansuensis*; En, *Elymus nutans*; Lv, *Ligularia virgaurea*; Mk, *Morina kokonorica*; Ap, *Aconitum pendulum*. LD and MD were the low and middle densities, respectively, of *Ligularia virgaurea* in degraded sown grassland. Related to Figure 3.

**Figure S11.** Network analysis of positive correlations between bacterial communities and root exudate modules ( $P < 0.05$ ) (A). Circles represent OTUs, diamonds represent root exudates, and the colors correspond to module colors. For OTUs, the size of the shapes

represent the relative abundance, and the relative content for root exudates. a-e are the networks of M-Lv, S-Pk, L-Lv, H-Lv and S-Lv. Related to Figure 3.

### **Supplemental Tables**

**Table S1.** Microbial community assembly fitting parameters. Related to Figure 1.

**Table S2.** The physico-chemical properties of soil. Related to Figure 2.

**Table S3.** T-tests of soil physicochemical properties in different habitats. Related to Figure 2.

**Table S4.** Comparison of the relative abundances of the dominant taxa among different habitats in Module #0, Module #1 and Module #2. Related to Figure 3.

**Table S5.** Operational taxonomic units (OTUs) numbers of soil dominant taxa at the phyla level within dominant phylotypes in Module #0, Module #1 and Module #2. Related to Figure 3.

**Table S6.** Comparison of the relative abundances of the dominant taxa between toxic plants and non-toxic plants in ME12. Related to Figure 4.

**Table S7.** Summary and abbreviations of experimental samples. Related to Figure 2.



**Table S1.** Microbial community assembly fitting parameters

| Sample            | Environment | Niche theory     |                | Neutral theory          |
|-------------------|-------------|------------------|----------------|-------------------------|
|                   |             | AIC (Log-normal) | R <sup>2</sup> | N <sub>m</sub>          |
| Toxic plants_2017 | Rhizosphere | 660276           | 0.858          | 28705.5 (26408*1.087)   |
| Bulk soil         | Bulk soil   | 37452            | 0.779          | 31399.1 (26408*1.189)   |
| H-Ap              | Rhizosphere | 37418            | 0.254          | 35730.0 (26408*1.353)   |
| M-Ap              | Rhizosphere | 37715            | 0.260          | 39664.8 (26408*1.502)   |
| H-Al              | Rhizosphere | 36222            | 0.258          | 39612.0 (26408*1.500)   |
| H-Ad              | Rhizosphere | 36890            | 0.276          | 38978.2 (26408*1.476)   |
| H-An              | Rhizosphere | 36329            | 0.235          | 34937.8 (26408*1.323)   |
| H-Ef              | Rhizosphere | 36233            | 0.263          | 40615.5 (26408*1.538)   |
| M-Ef              | Rhizosphere | 38643            | 0.207          | 37895.5 (26408*1.435)   |
| H-Lv              | Rhizosphere | 37883            | 0.260          | 38529.3 (26408*1.459)   |
| M-Lv              | Rhizosphere | 38305            | 0.264          | 40509.9 (26408*1.534)   |
| S-Lv              | Rhizosphere | 35240            | 0.297          | 41328.5 (26408*1.565)   |
| H-Mk              | Rhizosphere | 36251            | 0.293          | 37552.2 (26408*1.422)   |
| M-Mk              | Rhizosphere | 41813            | 0.267          | 41328.5 (26408*1.540)   |
| L-Mk              | Rhizosphere | 36329            | 0.248          | 37552.2 (26408*1.508)   |
| S-Oo              | Rhizosphere | 36378            | 0.265          | 40668.3 (26408*1.537)   |
| S-Pk              | Rhizosphere | 37048            | 0.264          | 39823.3 (26408*1.529)   |
| S-Sg              | Rhizosphere | 37452            | 0.235          | 40589.1 (26408*1.339)   |
| Toxic plants_2018 | Rhizosphere | 488658           | 0.769          | 40377.8 (103157*0.617)  |
| Non-toxic plants  | Rhizosphere | 147489           | 0.690          | 35360.3 (103157*1.576)  |
| S-H-Lv            | Rhizosphere | 66878            | 0.399          | 63647.9 (103157*2.116)  |
| S-M-Lv            | Rhizosphere | 58196            | 0.404          | 162575.4 (103157*1.808) |
| S-L-Lv            | Rhizosphere | 52042            | 0.395          | 218280.2 (103157*1.312) |
| S-PK              | Rhizosphere | 73296            | 0.423          | 186507.9 (103157*2.202) |
| H-Lv              | Rhizosphere | 45718            | 0.362          | 135342.0 (103157*0.764) |
| L-MK              | Rhizosphere | 70541            | 0.469          | 192903.6 (103157*1.87)  |
| L-Lv              | Rhizosphere | 47229            | 0.429          | 58902.6 (103157*0.571)  |
| M-Ap              | Rhizosphere | 72906            | 0.445          | 223334.9 (103157*2.165) |
| M-Lv              | Rhizosphere | 45098            | 0.430          | 101403.3 (103157*0.983) |
| S-En              | Rhizosphere | 71328            | 0.403          | 225913.8 (103157*2.190) |
| L-Kp              | Rhizosphere | 76428            | 0.477          | 206830.0(103157*2.005)  |

**Note:** L, lightly degraded grassland; M, moderately degraded grassland; H, heavily degraded grassland; S, degraded sown grassland. Nr, non-rhizosphere soil. Al, *Ajuga lupulina*; Ef, *Euphorbia fischeriana*; Sg, *Sphallerocarpus gracilis*; Oo, *Oxytropis ochrocephala*; Mk, *Morina kokonorica*; Pk, *Pedicularis kansuensis*; An, *Artemisia nanschanica*; Ad, *Artemisia dubia*; Ap, *Aconitum pendulum*; Lv, *Ligularia virgaurea*; En, *Elymus nutans*; Kp, *Kobresia pygmaea*. AIC, Akaike Information Criterion; R<sup>2</sup>, the fit to model; N<sub>m</sub>, the community size times immigration.

**Table S2.** The physico-chemical properties of soil

| Habitat                              | Samples   | pH   | TOC (g/kg) | TN (g/kg) | TP (g/kg) | AP (mg/kg) |
|--------------------------------------|-----------|------|------------|-----------|-----------|------------|
| Lightly degraded<br>grassland (L)    | Bulk soil | 6.55 | 75.0 bA    | 2.69      | 0.46      | 11.1A      |
|                                      | Mk        | 6.95 | 110.3 a    | 3.72      | 0.44      | 21.4       |
|                                      | Bulk soil | 7.18 | 50.6 cC    | 2.23 c    | 0.51      | 3.9 cB     |
|                                      | Al        | 7.39 | 65.9 abc   | 2.66 ab   | 0.58      | 8.5 b      |
| Moderately degraded<br>grassland (M) | Ef        | 7.13 | 84.1 a     | 3.22 abc  | 0.56      | 8.9 b      |
|                                      | Mk        | 7.54 | 76.6 ab    | 2.95 ab   | 0.64      | 16.0 a     |
|                                      | Ap        | 7.63 | 68.9 abc   | 2.94 a    | 0.53      | 8.5 b      |
|                                      | Lv        | 7.44 | 62.1 bc    | 2.50 bc   | 0.64      | 7.5 bc     |
|                                      | Bulk soil | 7.22 | 64.0AB     | 2.48 bc   | 0.38      | 9.9 cA     |
|                                      | Al        | 7.39 | 63.9       | 2.24 c    | 0.51      | 13.7 bc    |
|                                      | Ef        | 7.20 | 77.1       | 3.11 ab   | 0.56      | 9.3 c      |
| Heavily degraded<br>grassland (H)    | Sg        | 7.22 | 70.7       | 2.75 abc  | 0.47      | 15.7 bc    |
|                                      | Mk        | 7.53 | 82.5       | 3.10 ab   | 0.43      | 17.9 bc    |
|                                      | An        | 7.38 | 57.0       | 2.35 c    | 0.45      | 19.2 b     |
|                                      | Ad        | 7.08 | 99.3       | 2.72 abc  | 0.59      | 30.2 a     |
|                                      | Pk        | 7.61 | 56.8       | 2.47 bc   | 0.42      | 11.0bc     |
|                                      | Lv        | 7.12 | 80.9       | 3.29 a    | 0.48      | 15.7 bc    |
|                                      | Bulk soil | 7.27 | 57.5 bBC   | 2.48 b    | 0.57      | 4.6 cB     |
|                                      | Sg        | 7.45 | 90.4 a     | 3.60 a    | 0.69      | 12.9 ab    |
| Degraded sown<br>grassland (S)       | Oo        | 7.00 | 67.5 b     | 2.99 ab   | 0.58      | 10.9 abc   |
|                                      | Pk        | 7.29 | 86.9 a     | 3.73 a    | 0.67      | 18.2 a     |
|                                      | Lv        | 7.37 | 65.3 b     | 2.75 b    | 0.60      | 8.3 bc     |

Note: TN, soil total nitrogen; TP, soil total phosphorus; TOC, soil total organic carbon; AP, soil available phosphorus. Values are means of bulk soil (n = 3) and rhizosphere soil (n = 3) of each plant in different habitat. Values with different lowercase letters within a column represent are significantly from each other; capital letters represent significant difference among the bulk soils in different levels of grassland degradation ( $P < 0.05$ , one way ANOVA). Al, *Ajuga lupulina*; Ef, *Euphorbia fischeriana*; Sg, *Sphallerocarpus gracilis*; Oo, *Oxytropis ochrocephala*; Mk, *Morina kokonorica*; Pk, *Pedicularis kansuensis*; An, *Artemisia nanschanica*; Ad, *Artemisia dubia*; Ap, *Aconitum pendulum*; Lv, *Ligularia virgaurea*.

**Table S3.** *T*-tests of soil physicochemical properties in different habitats

| Habitat | Property    | Bulk soil | Rhizosphere soil | <i>P</i> value |
|---------|-------------|-----------|------------------|----------------|
| L       | pH          | 6.55±0.17 | 6.95±0.06        | 0.09           |
| L       | TOC (g/kg)  | 75±4.8    | 110.3±11.83      | 0.05           |
| L       | TN (g/kg)   | 2.69±0.07 | 3.72±0.48        | 0.10           |
| L       | TP (g/kg)   | 0.46±0.04 | 0.44±0.06        | 0.78           |
| L       | DON (mg/kg) | 382±20.7  | 459±51.4         | 0.24           |
| L       | AP (mg/kg)  | 11.1±1.24 | 21.4±4.67        | 0.10           |
| L       | AK (mg/kg)  | 150±28.9  | 217±48.4         | 0.30           |
| L       | ANa (mg/kg) | 15.7±1.76 | 23.3±6.74        | 0.33           |
| M       | pH          | 7.18±0.18 | 7.42±0.08        | 0.24           |
| M       | TOC (g/kg)  | 50.7±3.03 | 71.5±3.22        | 0.01           |
| M       | TN (g/kg)   | 2.23±0.09 | 2.85±0.1         | 0.02           |
| M       | TP (g/kg)   | 0.51±0.04 | 0.59±0.02        | 0.18           |
| M       | DON (mg/kg) | 288±26.7  | 323±15.01        | 0.34           |
| M       | AP (mg/kg)  | 3.88±0.35 | 9.9±0.98         | 0.02           |
| M       | AK (mg/kg)  | 113±24    | 194±18.38        | 0.05           |
| M       | ANa (mg/kg) | 15±1.73   | 15.3±1.09        | 0.92           |
| H       | pH          | 7.22±0.18 | 7.32±0.06        | 0.59           |
| H       | TOC (g/kg)  | 64±2.73   | 73.5±4.23        | 0.08           |
| H       | TN (g/kg)   | 2.48±0.18 | 2.75±0.1         | 0.36           |
| H       | TP (g/kg)   | 0.38±0.1  | 0.49±0.02        | 0.16           |
| H       | DON (mg/kg) | 298±26.2  | 336±15.34        | 0.40           |
| H       | AP (mg/kg)  | 9.86±0.53 | 16.59±1.49       | 0.00           |
| H       | AK (mg/kg)  | 90±14     | 232.1±35.07      | 0.00           |
| H       | ANa (mg/kg) | 17.7±2.19 | 14.1±1.22        | 0.33           |
| S       | pH          | 7.27±0.27 | 7.28±0.1         | 0.97           |
| S       | TOC (g/kg)  | 57.5±3.78 | 77.5±3.91        | 0.03           |
| S       | TN (g/kg)   | 2.48±0.18 | 3.26±0.16        | 0.04           |
| S       | TP (g/kg)   | 0.57±0.03 | 0.63±0.03        | 0.24           |
| S       | DON (mg/kg) | 339±42.4  | 394±39.99        | 0.52           |
| S       | AP (mg/kg)  | 4.61±0.39 | 12.56±1.6        | 0.00           |
| S       | AK (mg/kg)  | 130±15.3  | 296±56.32        | 0.02           |
| S       | ANa (mg/kg) | 14.7±1.2  | 14.3±1.85        | 0.92           |

Note: L, lightly degraded grassland; M, moderately degraded grassland; H, heavily degraded grassland; S, degraded sown grassland. TOC, soil total organic carbon; TN, total nitrogen; total phosphorous (TP), available phosphorous (AP), nitrate nitrogen (NO<sub>3</sub>-N), ammonium nitrogen (NH<sub>4</sub>-N), Dissolved organic nitrogen (DON), available potassium (AK), available sodium (ANa). Bold values indicate a significant difference between bulk soil and rhizosphere. Values are means ± SD of bulk soil (n = 3) and rhizosphere soil (n = 3 in L, n= 15 in M, n = 21 in H and n = 12 in S).

**Table S4.** Comparison of the relative abundances of the dominant taxa among different habitats in Module #0, Module #1 and Module #2

|          | Habitat | Mode      | Bulk soil | Rhizosphere soil | <i>P</i> value |
|----------|---------|-----------|-----------|------------------|----------------|
| Bacteria | L       | Module #0 | 0.75±0.02 | 0.77±0.06        | 0.8            |
| Bacteria | L       | Module #1 | 1.36±0.19 | 1.59±0.14        | 0.37           |
| Bacteria | L       | Module #2 | 1.88±0.41 | 1.51±0.06        | 0.46           |
| Bacteria | M       | Module #0 | 0.52±0.03 | 0.47±0.04        | 0.67           |
| Bacteria | M       | Module #1 | 0.94±0.06 | 1.06±0.05        | 0.27           |
| Bacteria | M       | Module #2 | 2.78±0.41 | 1.85±0.09        | 0.002          |
| Bacteria | H       | Module #0 | 0.66±0.04 | 0.8±0.06         | 0.44           |
| Bacteria | H       | Module #1 | 1.91±0.06 | 1.72±0.2         | 0.39           |
| Bacteria | H       | Module #2 | 2.03±0.45 | 1.93±0.27        | 0.9            |
| Bacteria | S       | Module #0 | 0.82±0.05 | 1.18±0.28        | 0.53           |
| Bacteria | S       | Module #1 | 1.43±0.15 | 2.22±0.5         | 0.46           |
| Bacteria | S       | Module #2 | 2.3±0.26  | 1.58±0.14        | 0.04           |
| Fungi    | L       | Module #0 | 0.87±0.39 | 1.54±0.29        | 0.25           |
| Fungi    | L       | Module #1 | 0.19±0.13 | 0.61±0.13        | 0.08           |
| Fungi    | L       | Module #2 | 0.41±0.13 | 0.56±0.05        | 0.34           |
| Fungi    | M       | Module #0 | 1.33±0.55 | 0.97±0.24        | 0.54           |
| Fungi    | M       | Module #1 | 0.5±0.16  | 0.81±0.21        | 0.53           |
| Fungi    | M       | Module #2 | 1.33±0.71 | 1.08±0.23        | 0.68           |
| Fungi    | H       | Module #0 | 1.07±0.26 | 1.82±0.27        | 0.35           |
| Fungi    | H       | Module #1 | 1.04±0.26 | 1.3±0.24         | 0.72           |
| Fungi    | H       | Module #2 | 0.82±0.36 | 2.13±1.12        | 0.69           |
| Fungi    | S       | Module #0 | 1.04±0.28 | 4.28±2.09        | 0.46           |
| Fungi    | S       | Module #1 | 0.72±0.31 | 3.13±2.21        | 0.61           |
| Fungi    | S       | Module #2 | 1.03±0.35 | 0.41±0.06        | 0.01           |

Note: BS, bulk soil; RS, rhizosphere soil. Values are means ± SD of bulk soil (n = 3) and rhizosphere soil (n = 3 in L, n= 15 in M, n = 21 in H and n = 12 in S).

**Table S5.** Operational taxonomic units (OTUs) numbers of soil dominant taxa at the phyla level within dominant phylotypes in Module #0, Module #1 and Module #2

| Phylum           | Dominant phylotypes |                |                |
|------------------|---------------------|----------------|----------------|
|                  | from module #0      | from module #1 | from module #2 |
| Acidobacteria    | 2                   | 0              | 8              |
| Actinobacteria   | 2                   | 3              | 0              |
| Armatimonadetes  | 1                   | 0              | 0              |
| Bacteroidetes    | 4                   | 0              | 0              |
| Chloroflexi      | 2                   | 1              | 6              |
| Cyanobacteria    | 2                   | 2              | 1              |
| Bacteria         | 0                   | 0              | 1              |
| Gemmatimonadetes | 1                   | 1              | 5              |
| Latescibacteria  | 0                   | 0              | 3              |
| Nitrospirae      | 0                   | 0              | 4              |
| Omnitrophica     | 0                   | 0              | 1              |
| Planctomycetes   | 3                   | 12             | 6              |
| Proteobacteria   | 10                  | 10             | 11             |
| Verrucomicrobia  | 0                   | 0              | 2              |
| Fungi            | 17                  | 7              | 9              |
| Basidiomycota    | 1                   | 6              | 1              |

**Table S6.** Comparison of the relative abundances of the dominant taxa between toxic plants and non-toxic plants in ME12

|          | Taxa                  | Toxic plants | Non-toxic plants | <i>P</i> value |
|----------|-----------------------|--------------|------------------|----------------|
| Bacteria | p_Acidobacteria       | 0.120        | 0.016            | 0.000          |
| Bacteria | p_Actinobacteria      | 0.010        | 0.009            | 0.831          |
| Bacteria | p_Armatimonadetes     | 0.010        | 0.003            | 0.013          |
| Bacteria | p_Bacteroidetes       | 0.014        | 0.042            | 0.018          |
| Bacteria | p_Chlorobi            | 0.003        | 0.004            | 0.714          |
| Bacteria | p_Chloroflexi         | 0.006        | 0.007            | 0.074          |
| Bacteria | p_Gemmatimonadetes    | 0.065        | 0.032            | 0.141          |
| Bacteria | p_Planctomycetes      | 0.093        | 0.065            | 0.094          |
| Bacteria | c_Alphaproteobacteria | 1.805        | 0.572            | 0.000          |
| Bacteria | c_Betaproteobacteria  | 0.024        | 0.022            | 0.600          |
| Bacteria | c_Deltaproteobacteria | 0.001        | 0.002            | 0.023          |
| Bacteria | c_Gammaproteobacteria | 0.038        | 0.010            | 0.007          |
| Bacteria | p_Saccharibacteria    | 0.004        | 0.003            | 0.019          |
| Fungi    | p_Ascomycota          | 0.193        | 0.138            | 0.358          |
| Fungi    | p_Basidiomycota       | 0.128        | 0.025            | 0.005          |
| Fungi    | p_Chytridiomycota     | 0.017        | 0.001            | 0.072          |
| Fungi    | p_Mortierellomycota   | 0.341        | 0.082            | 0.220          |

Note: Values are means of toxic plants (n = 15) and non-toxic plants (n = 6). *P* based on Student's t-test.

**Table S7.** Summary and abbreviations of experimental samples

| Species                         | Family           | Life cycle   | L    |      |      | M    |      |      | H    |      |      | S    |      |      |
|---------------------------------|------------------|--------------|------|------|------|------|------|------|------|------|------|------|------|------|
|                                 |                  |              | Freq | 2017 | 2018 |
| <i>Aconitum pendulum</i>        | Ranunculaceae    | Reproductive |      |      |      | 0.9  | √    | √    | 0.6  | √    |      |      |      |      |
| <i>Ajuga lupulina</i>           | Labiatae         | Reproductive |      |      |      | 0.6  | √    |      | 0.5  | √    |      |      |      |      |
| <i>Artemisia dubia</i>          | Compositae       | Reproductive |      |      |      |      |      |      | 0.6  | √    |      |      |      |      |
| <i>Artemisia nanschanica</i>    | Compositae       | Reproductive |      |      |      |      |      |      | 0.7  | √    |      |      |      |      |
| <i>Elymus nutans</i>            | Gramineae        | Reproductive |      |      |      |      |      |      |      |      |      | 1    |      | √    |
| <i>Euphorbia fischeriana</i>    | Euphorbiaceae    | Reproductive |      |      |      | 0.7  | √    |      | 0.2  | √    |      |      |      |      |
| <i>Kobresia pygmaea</i>         | Cyperaceae       | Reproductive | 0.9  |      | √    |      |      |      |      |      |      |      |      |      |
| <i>Ligularia virgaurea</i>      | Compositae       | Vegetative   | 0.2  |      | √    | 0.7  | √    | √    | 0.8  |      | √    | 0.5  | √    | √    |
| <i>Morina kokonorica</i>        | Dipsacaceae      | Reproductive | 0.6  | √    | √    | 0.9  | √    |      | 0.5  | √    |      |      |      |      |
| <i>Oxytropis ochrocephala</i>   | Leguminosae      | Reproductive |      |      |      |      |      |      |      |      |      | 0.8  | √    |      |
| <i>Pedicularis kansuensis</i>   | Scrophulariaceae | Reproductive |      |      |      |      |      |      |      |      |      | 0.5  | √    | √    |
| <i>Sphallerocarpus gracilis</i> | Apiaceae         | Reproductive |      |      |      |      |      |      | 0.5  | √    |      | 0.1  | √    |      |

Notes: Freq: the frequency of plant sample survey; √ represented the collected samples. L, lightly degraded grassland; M, moderately degraded grassland; H, heavily degraded grassland; S, degraded sown grassland. *Elymus nutans* and *Kobresia pygmaea* are the non-toxic plants.

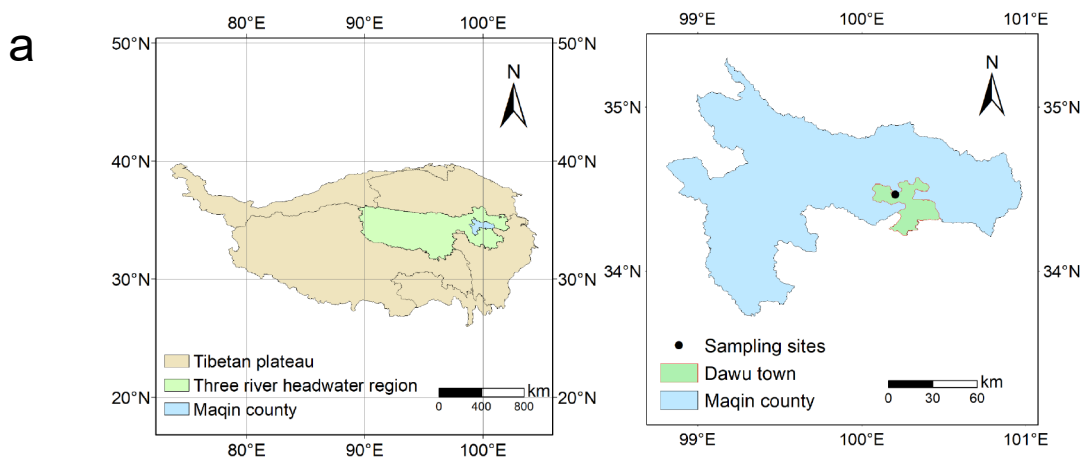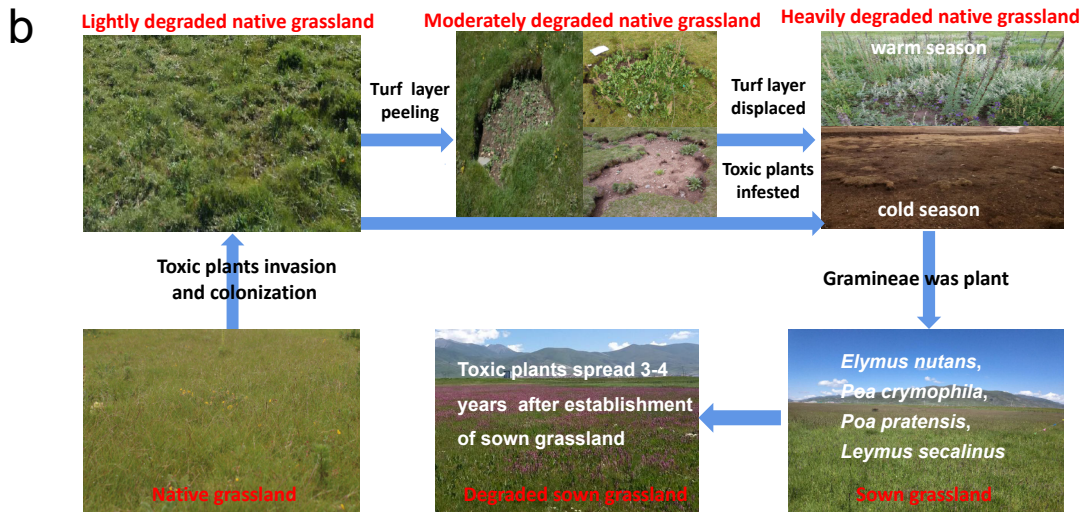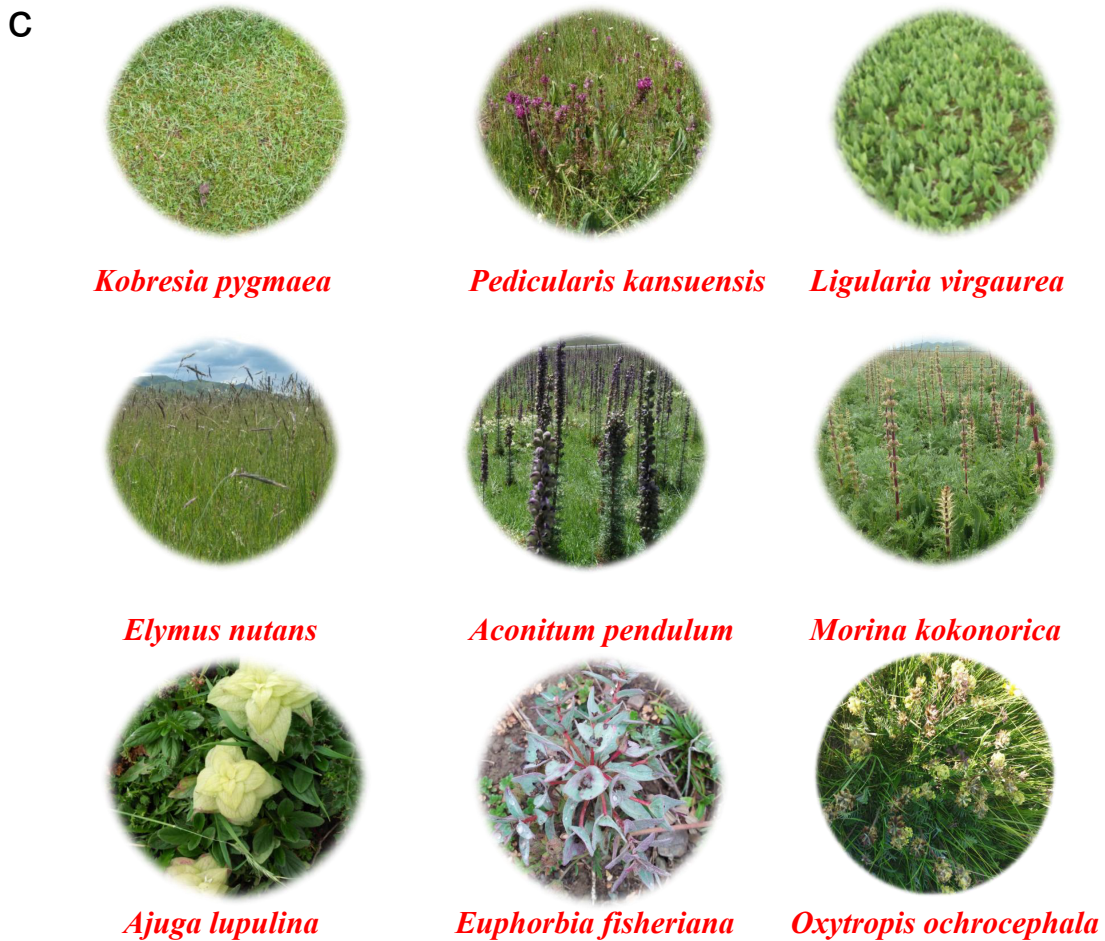



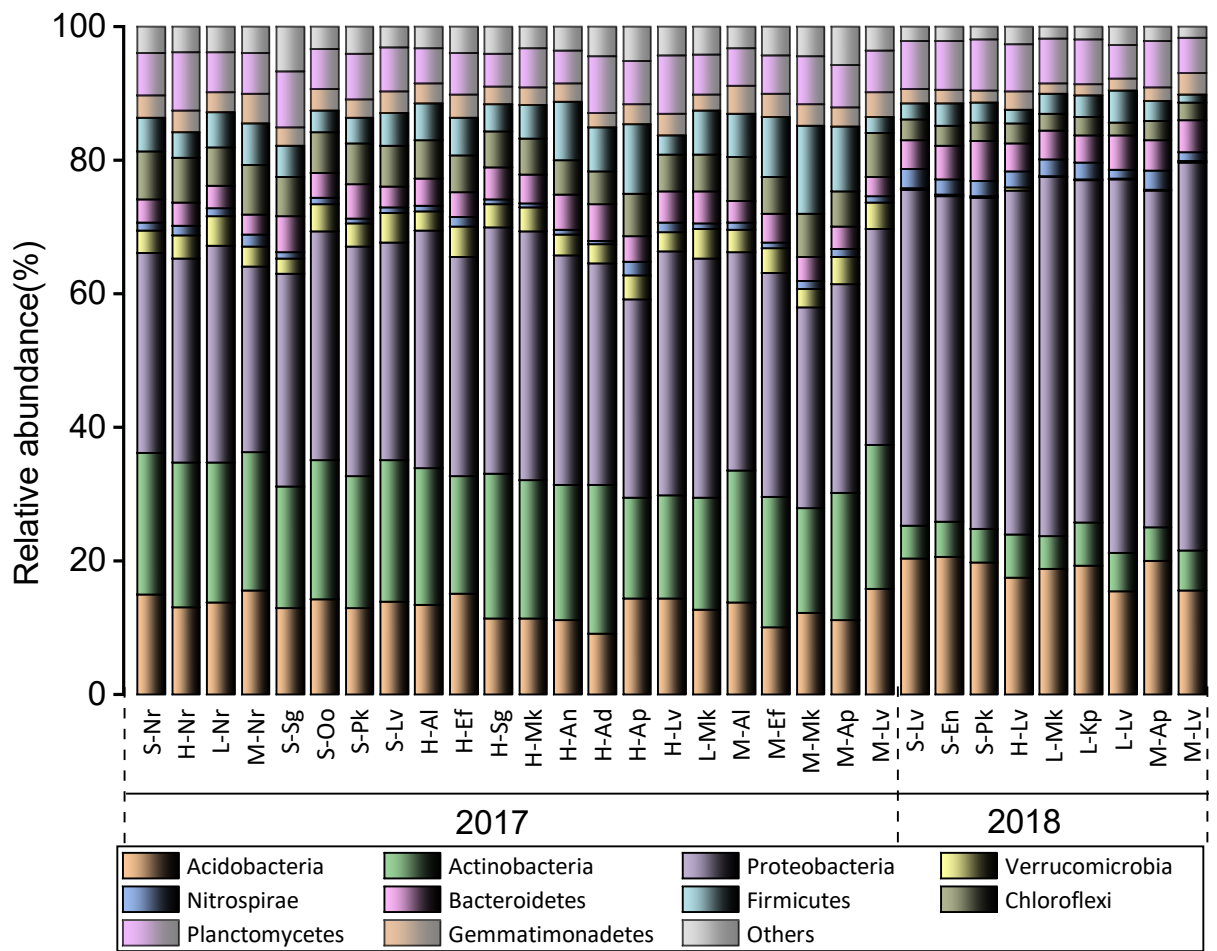

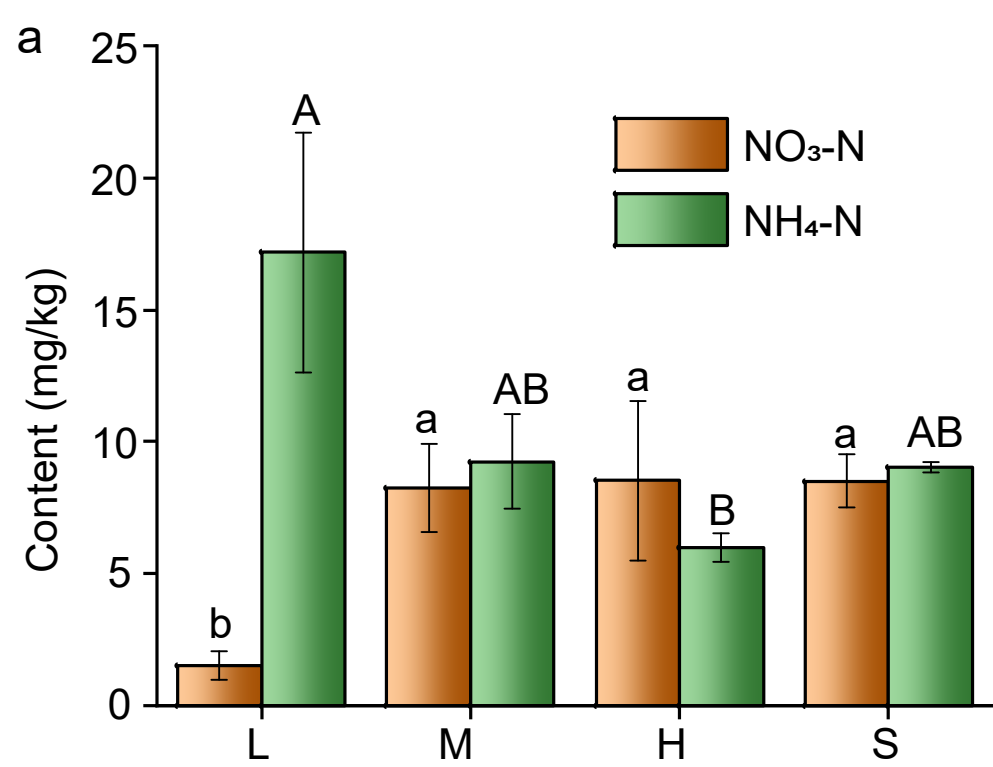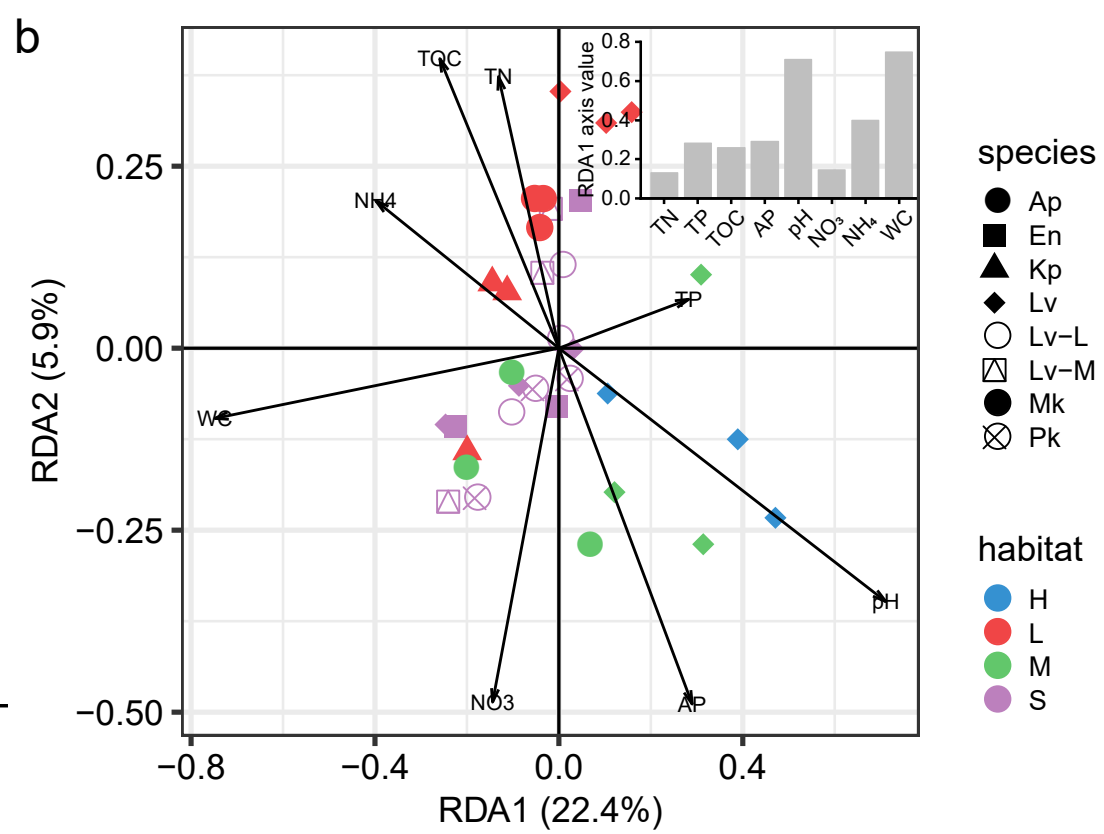

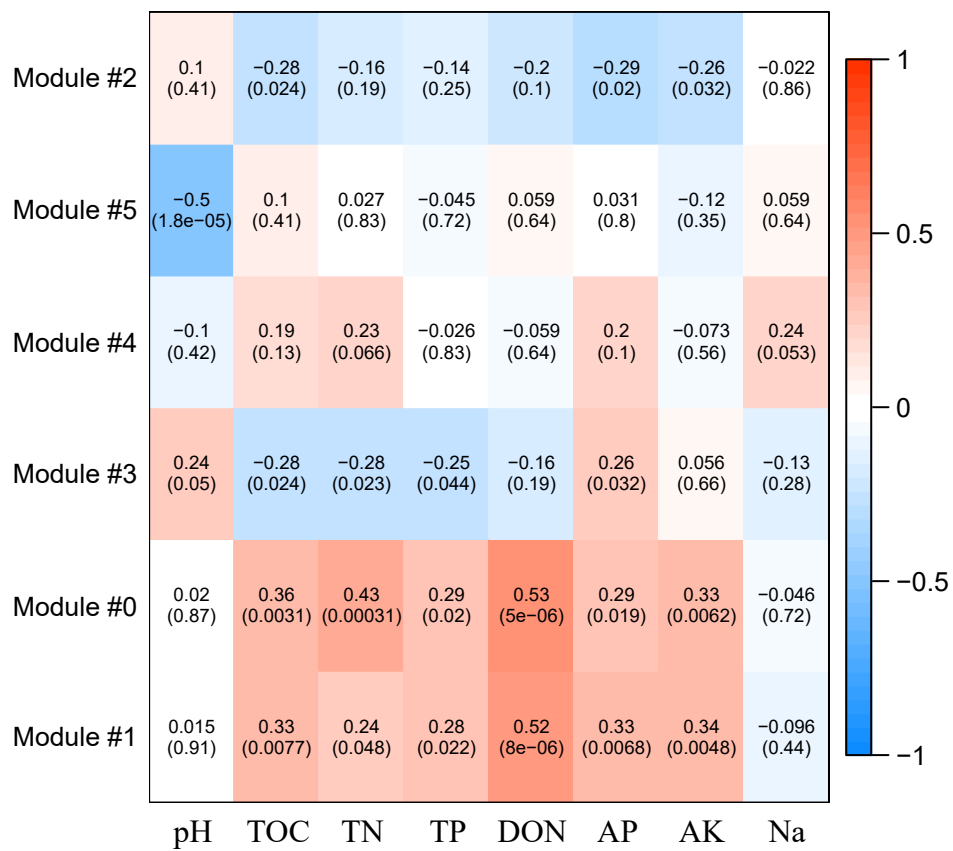

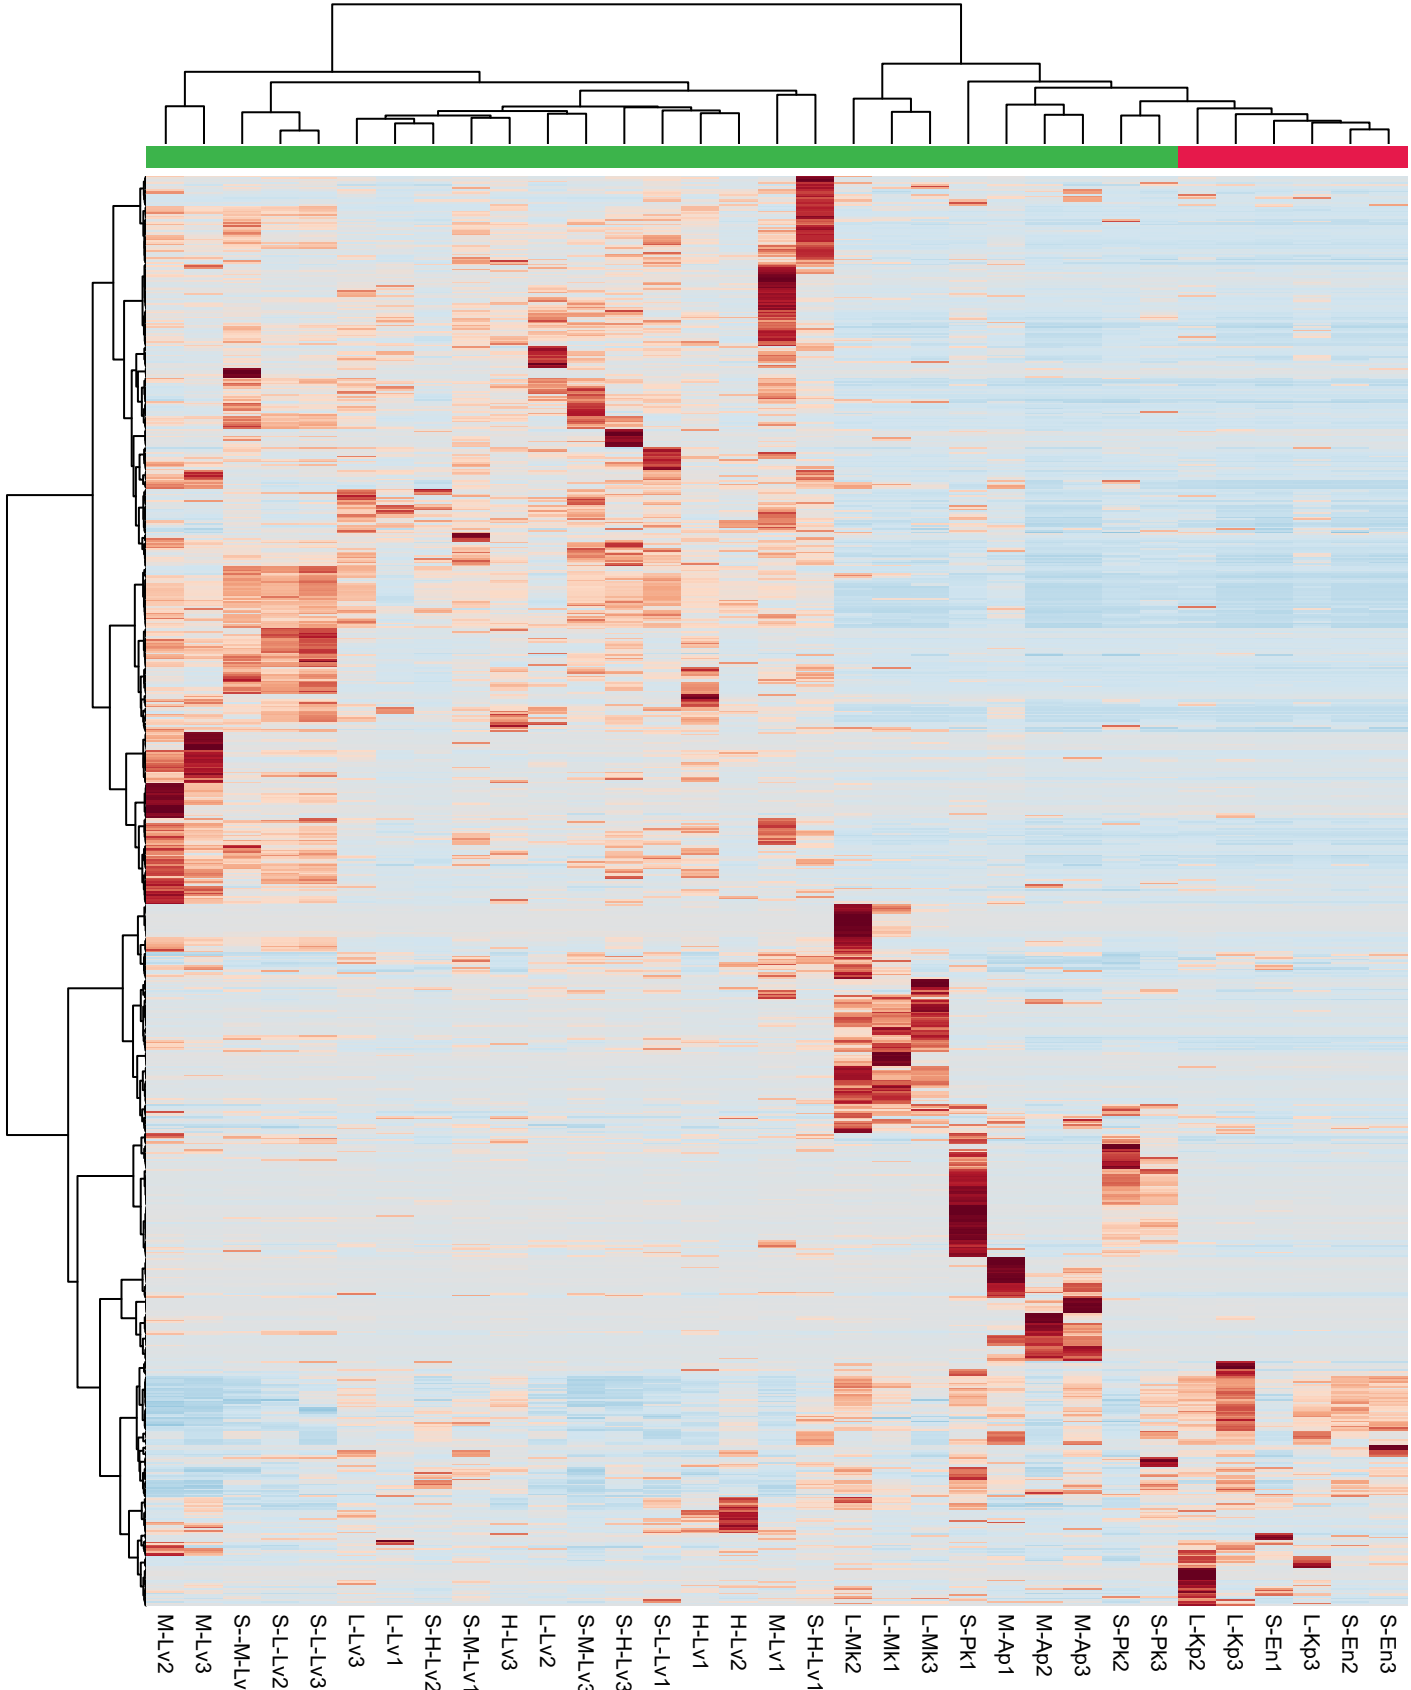

**class**  
Non-toxic plants  
Toxic plants

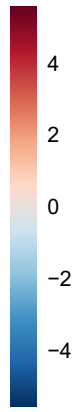



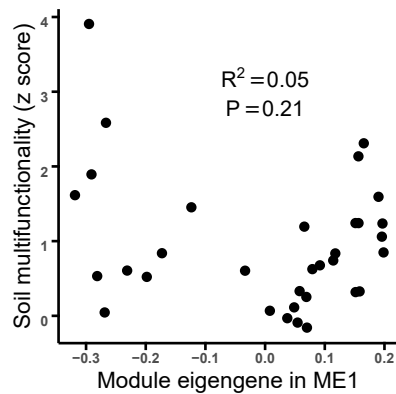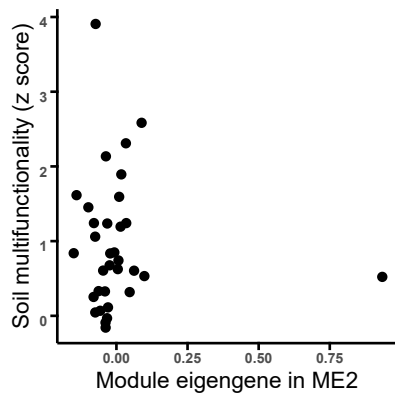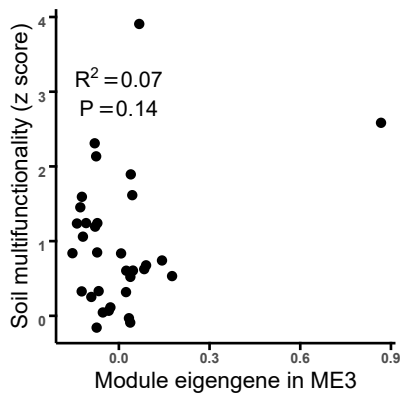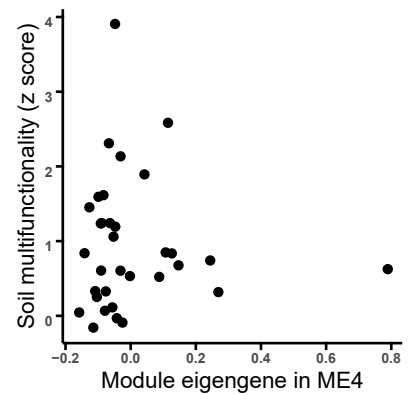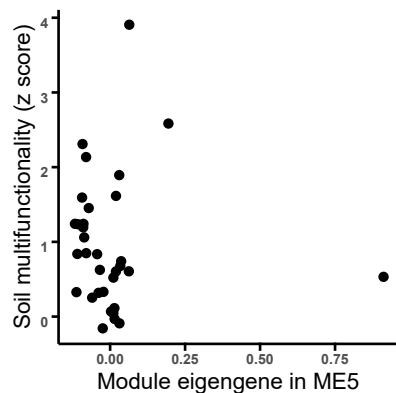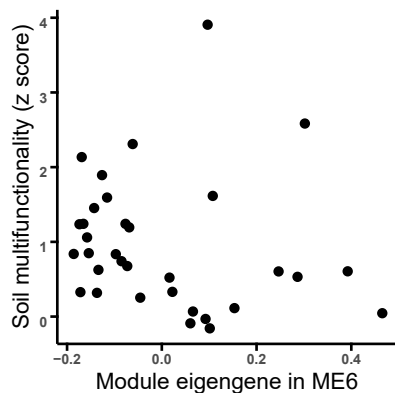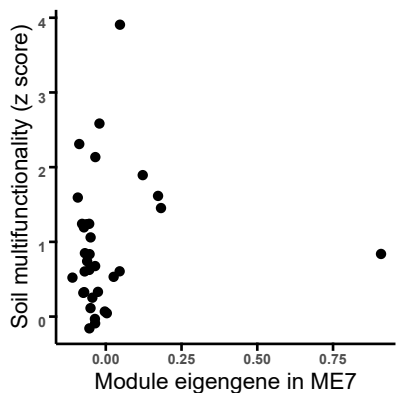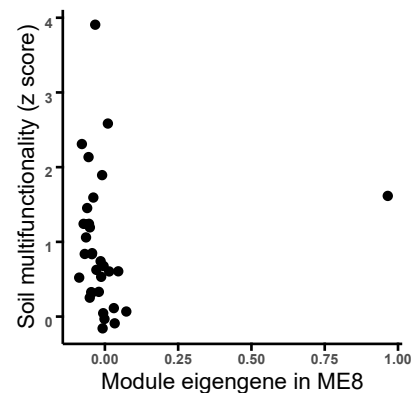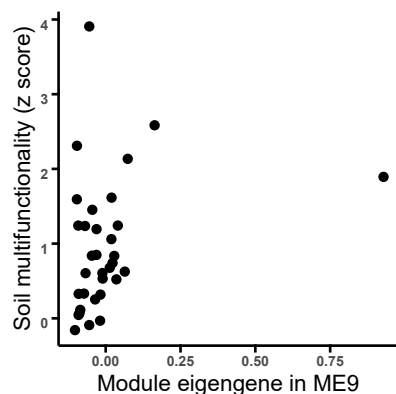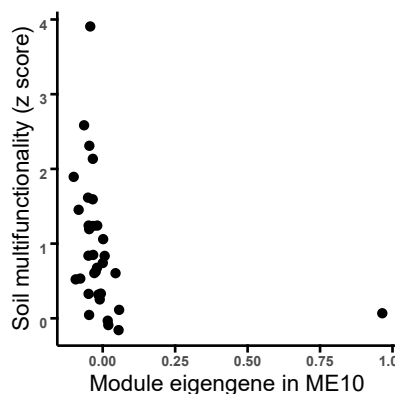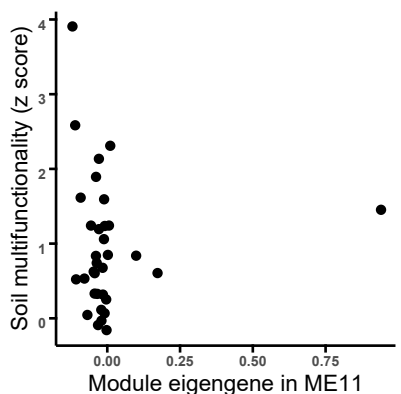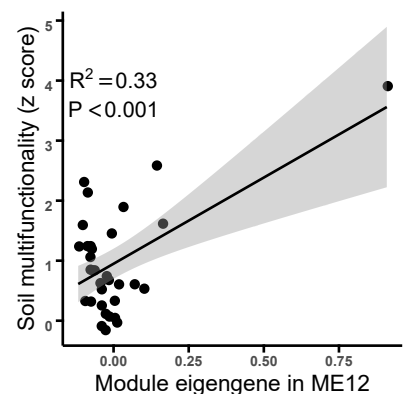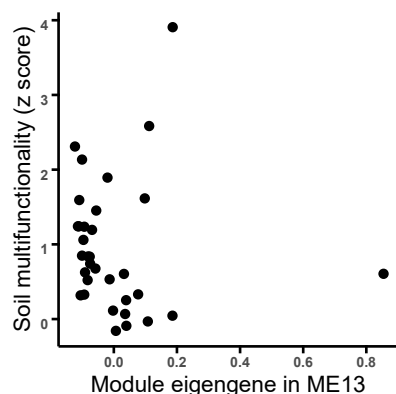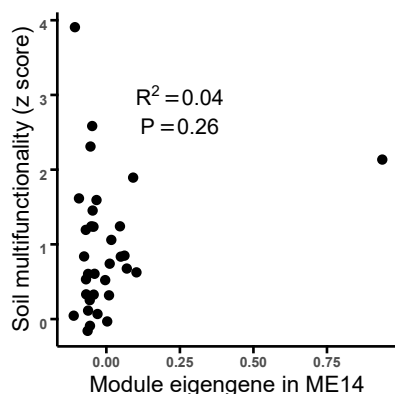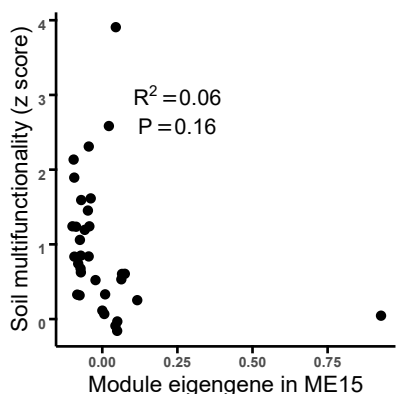

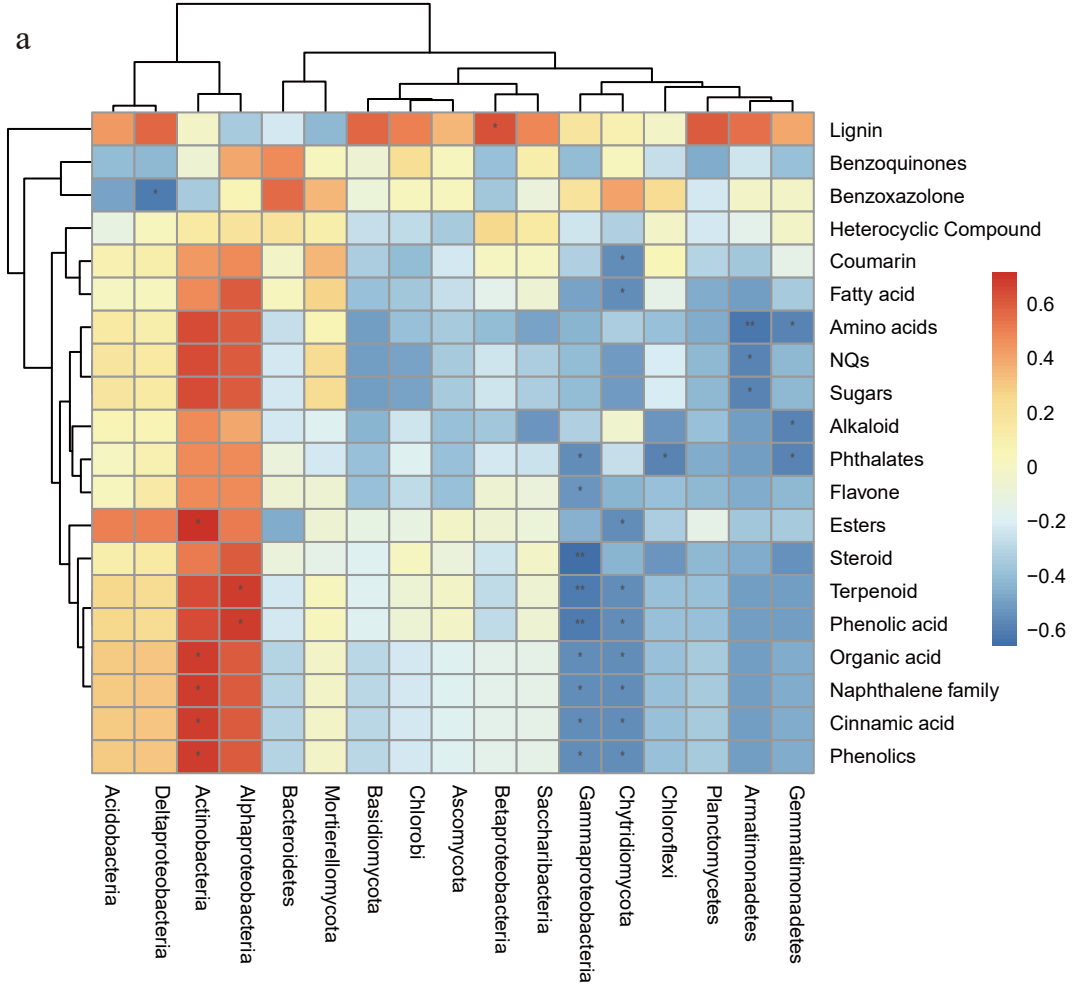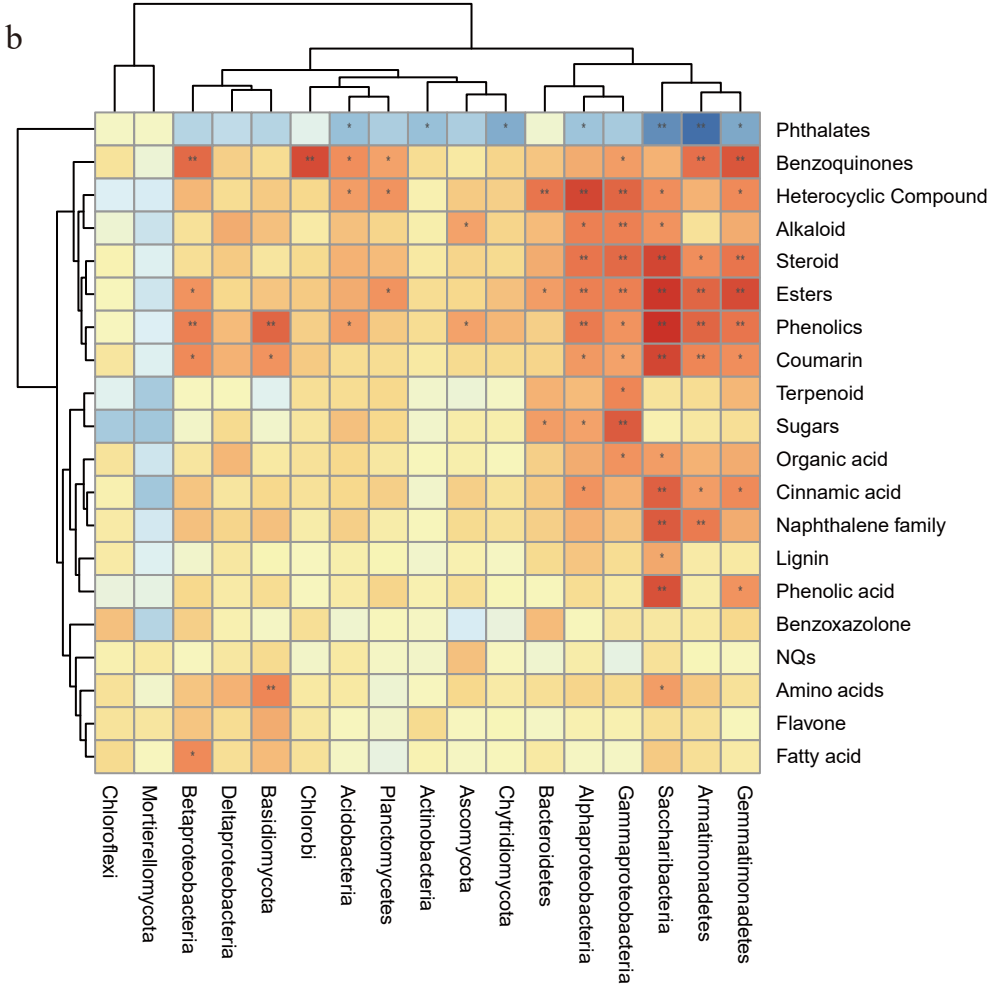

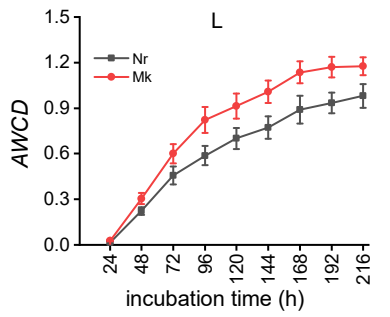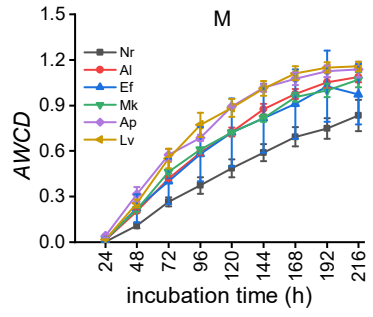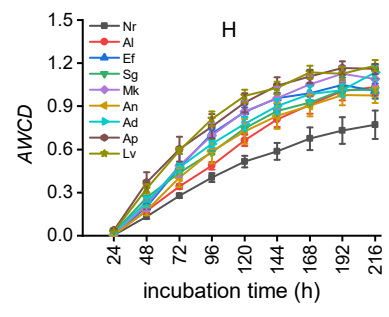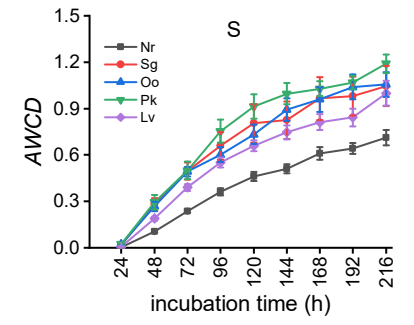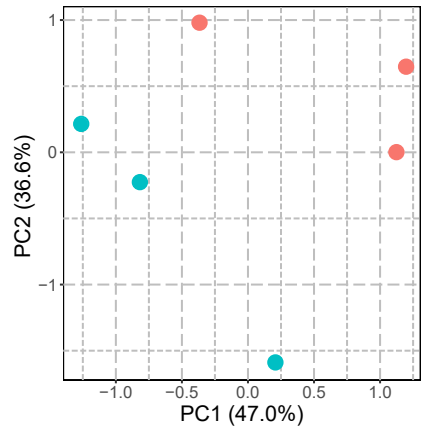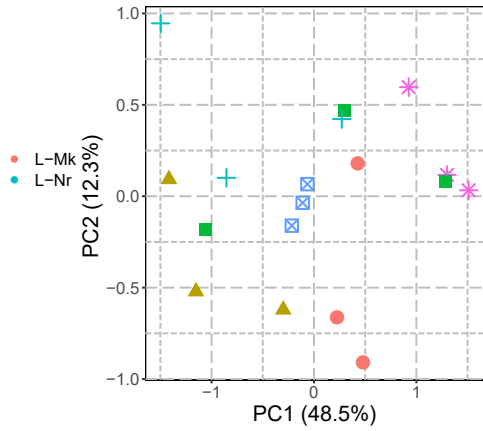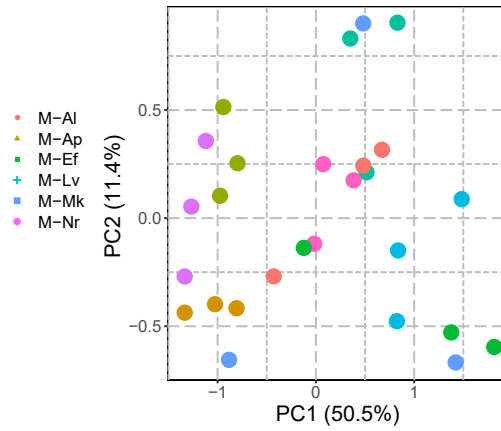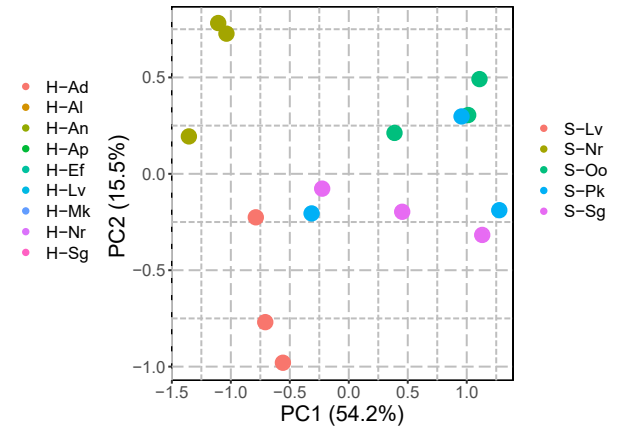



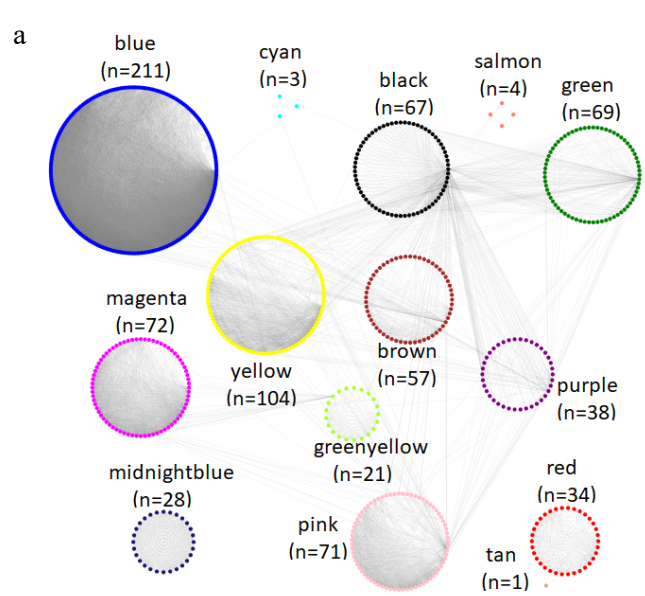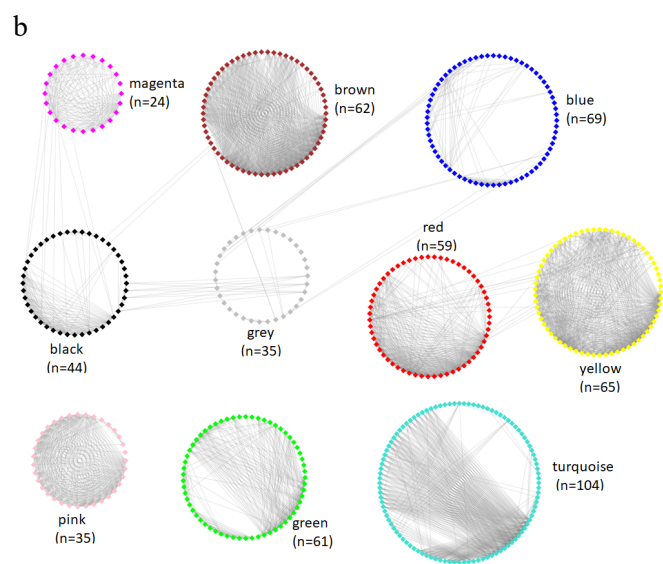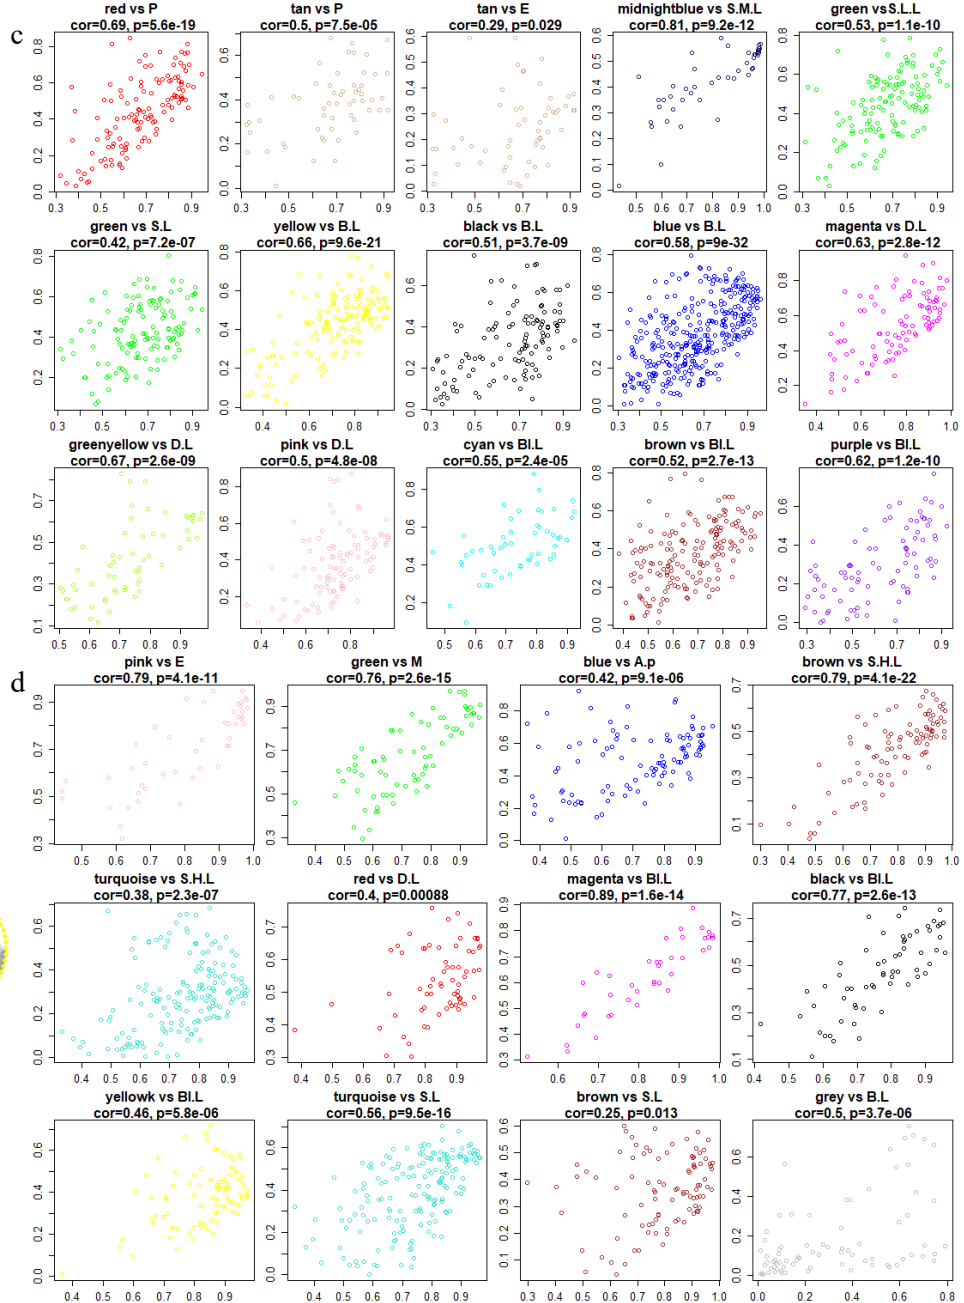

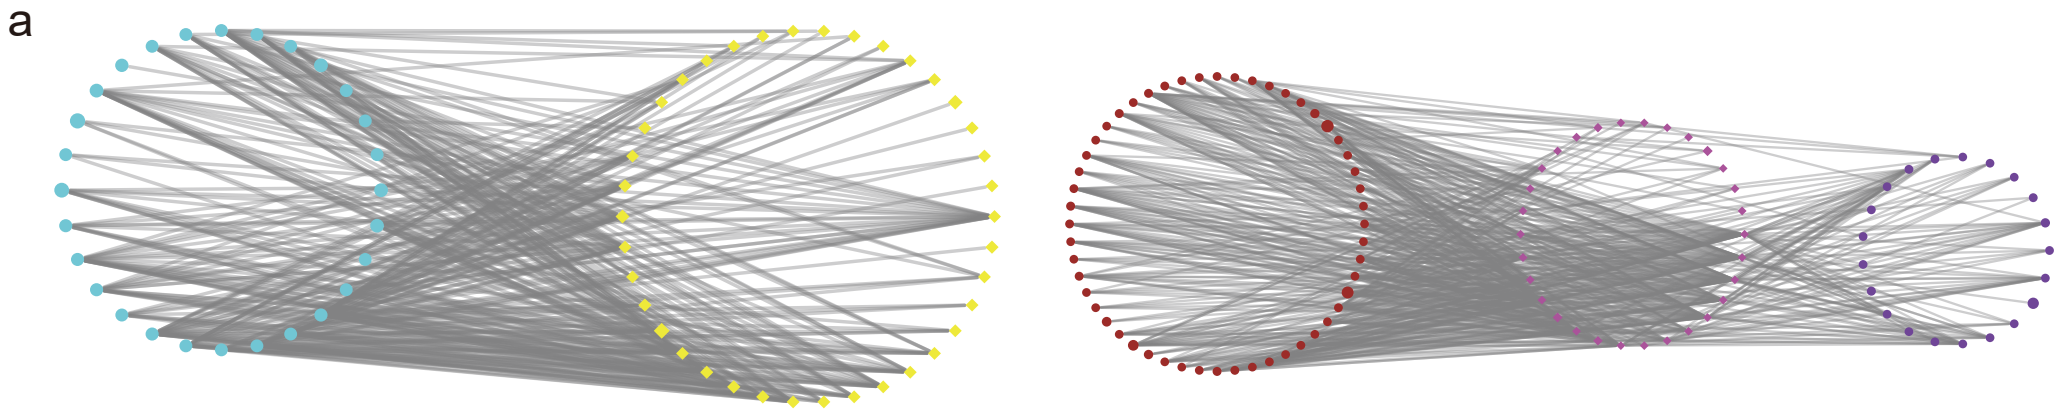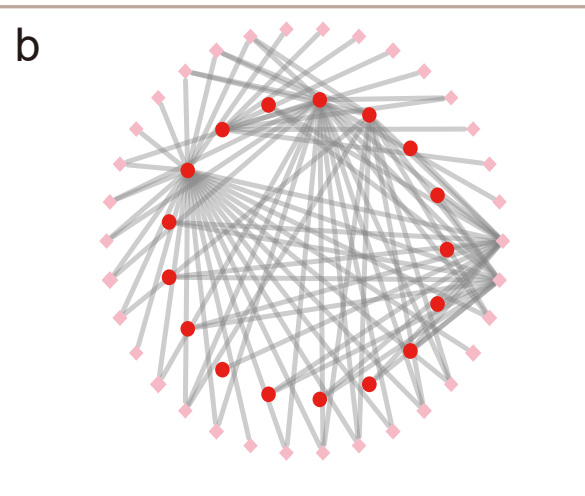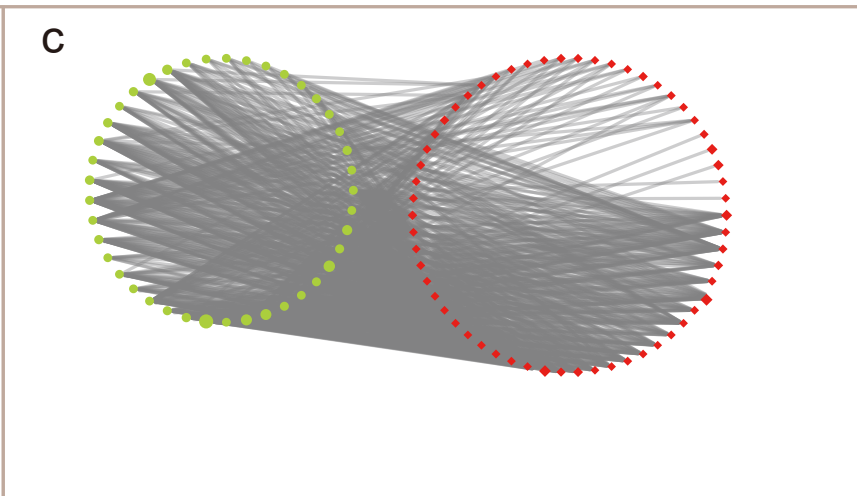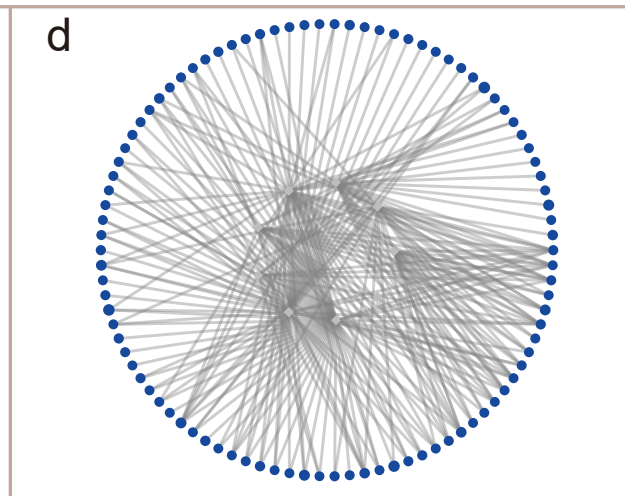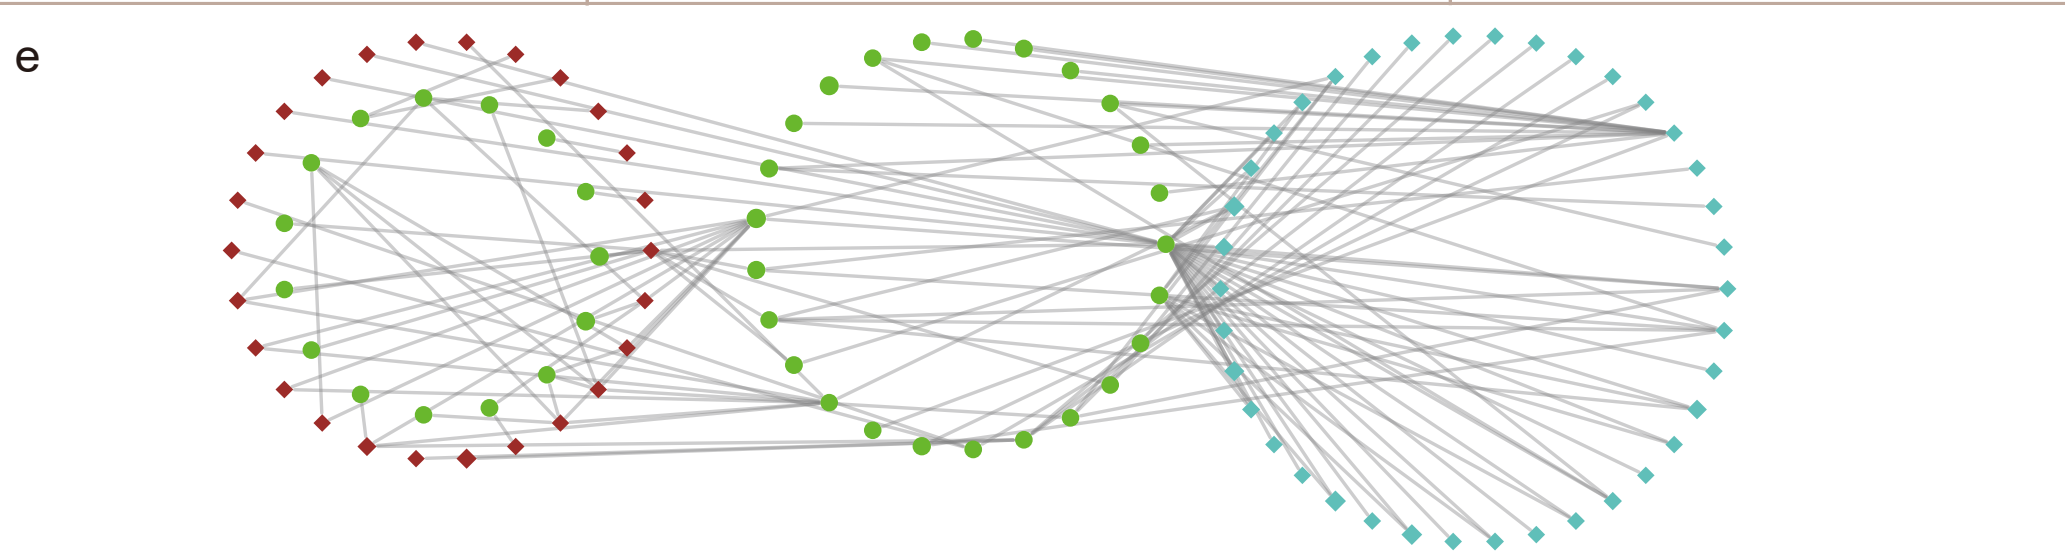

Supplement: mmc1.pdf [file mmc1.pdf]
